# Supplementary material for: The influence of Holliday junction sequence and dynamics on DNA crystal self-assembly
Source: PubMed Central journal article supplement (PMC9166708; doi:10.1038/s41467-022-30779-6), 2022-06-03
Supplement: 41467_2022_30779_MOESM2_ESM.pdf [file 41467_2022_30779_MOESM2_ESM.pdf]

## Description of Additional Supplementary Files

**Supplementary Data 1:** DNA sequences used for each constituent oligonucleotide combination for all 36 immobile junctions in each of the three systems used in this work.
